# Supplementary material for: From general base to general acid catalysis in a sodium-specific DNAzyme by a guanine-to-adenine mutation
Source: PubMed Central journal article supplement (PMC6736077; doi:10.1093/nar/gkz578), 2019-07-05
Supplement: gkz578_supplemental_file.pdf [file gkz578_supplemental_file.pdf]

## Supplementary Data

### **From general base to general acid catalysis in a sodium-specific DNzyme by a guanine-to-adenine mutation**

Lingzi Ma, Sanjana Kartik, Biwu Liu, and Juewen Liu\*

Department of Chemistry, Waterloo Institute for Nanotechnology, University of Waterloo,  
Waterloo, Ontario, N2L 3G1, Canada

Email: [liujw@uwaterloo.ca](mailto:liujw@uwaterloo.ca)

**Table S1.** DNA sequences used in this work. FAM = carboxyfluorescein; rA = adenine ribonucleotide; /2AP/ = 2-aminopurine; /2,6-diAP/ = 2,6-diaminopurine; /I/ = hypoxanthine. The asterisk denotes for a PS modification. The individual mutants are not listed here and they can be obtained based on Figure 2B and Figure 3A.

| <b>DNA Names</b> | <b>Sequences and modifications</b>                                     |
|------------------|------------------------------------------------------------------------|
| FAM-PO-Sub       | GTCACGAGTCACTATrAGGAAGATGGCGAAA-FAM                                    |
| NaH1             | TTTCGCCATAGGTCAAAGGTGGGTGGGAGTTTTTACTCCGCATTAGTGA<br>CTCGTGAC          |
| NaA43T           | TTTCGCCATCCAGGTCAAAGGTGGGTGAGGAGTTTTTACTCCGCGTTA<br>GTGACTCGTGAC       |
| NaH1-G           | TTTCGCCATAGGTCAAAGGTGGGTGGGAGTTTTTACTCCGCGTTAGTGA<br>CTCGTGAC          |
| NaH1-2AP         | TTTCGCCATAGGTCAAAGGTGGGTGGGAGTTTTTACTCCGC/2AP/TTAGT<br>GACTCGTGAC      |
| NaH1-2,6diAP     | TTTCGCCATAGGTCAAAGGTGGGTGGGAGTTTTTACTCCGC/2,6-<br>diAP/TTAGTGACTCGTGAC |
| NaA43T-A         | TTTCGCCATCCAGGTCAAAGGTGGGTGAGGAGTTTTTACTCCGCGATTA<br>GTGACTCGTGAC      |
| NaA43T-I         | TTTCGCCATCCAGGTCAAAGGTGGGTGAGGAGTTTTTACTCCGCG/I/TTA<br>GTGACTCGTGAC    |
| Sub              | GTCACGAGTCACTATrAGGAAGATGGCGAAA                                        |
| Sub-dA           | GTCACGAGTCACTATAGGAAGATGGCGAAA                                         |
| FAM-PS-Sub       | GTCACGAGTCACTATrA*GGAAGATGGCGAAA-FAM                                   |

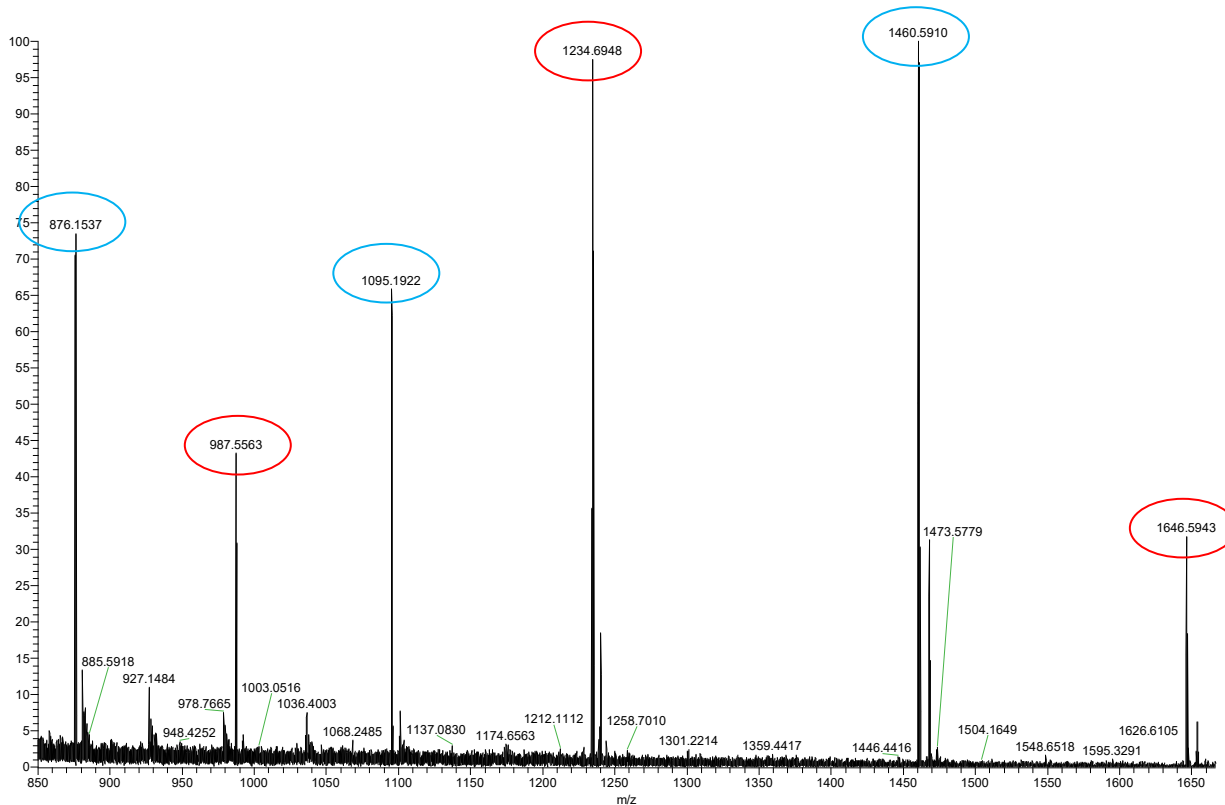

**Figure S1.** Mass spectrometry characterization of the NaH1 cleavage product. The red peaks represent the 5'-fragment of the cleaved-substrate containing a 2', 3'-cyclic phosphate group (MW=4942.7 Da, 3, 4 and 5 charges for three marked peaks). The blue peaks represent the 3'-fragment of the cleaved-substrate (MW=4384.7 Da, 3, 4 and 5 charges for the three marked peaks). The sample was prepared by reacting non-labeled substrates (**Table S1**) with NaH1 DNazymes (in 1:1.5 ratio) in 50 mM MES buffer (pH 6, 25 mM LiCl, 100 mM NaCl) for overnight. A Sep-Pak column was further used to desalt the sample. After dried, the sample was re-suspended in 20  $\mu$ L Milli-Q water with a final substrate concentration of  $\sim$ 50  $\mu$ M and analyzed with an ESI mass spectrometer.
